# Supplementary material
Source: PubMed Central journal article supplement (PMC7153303)

## Electronic Supplementary Material

### Acetate as a model for aspartate-based CXCR4 chemokine receptor binding of cobalt and nickel complexes of cross-bridged tetraazamacrocycles

Amy N. Cain,<sup>a</sup> TaRynn N. Carder Freeman,<sup>a</sup> Kimberly D. Roewe,<sup>a</sup> David L. Cockriel,<sup>c</sup> Travis R. Hasley,<sup>a</sup> Randall D. Maples,<sup>a</sup> Elisabeth M. A. Allbritton,<sup>a</sup> Thomas D'Huys,<sup>d</sup> Tom van Loy,<sup>d</sup> Benjamin P. Burke,<sup>b</sup> Timothy J. Prior,<sup>b</sup> Dominique Schols,<sup>d</sup> Stephen J. Archibald<sup>b\*</sup> and Timothy J. Hubin<sup>a\*</sup>

#### Contents

|                            |   |
|----------------------------|---|
| 1. Crystallography.....    | 2 |
| 2. UV-Vis Spectra.....     | 6 |
| 3. Cyclic Voltammetry..... | 8 |

# 1. Crystallography

**Table S1.** Crystal Data and Structural Refinement Details for Cobalt Complexes.

| Complex                                | [Co(1)Cl <sub>2</sub> ]<br>sja15_04                                  | [Co(2)(OAc)](PF <sub>6</sub> ) <sub>2</sub><br>sja21_12                                            | [Co(6)(OAc)](PF <sub>6</sub> ) <sub>2</sub><br>sja32_08                                            | [Co(5)(OAc)<br>(H <sub>2</sub> O)](PF <sub>6</sub> )<br>sja26_08                     |
|----------------------------------------|----------------------------------------------------------------------|----------------------------------------------------------------------------------------------------|----------------------------------------------------------------------------------------------------|--------------------------------------------------------------------------------------|
| CCDC number                            | 1566342                                                              | 1567495                                                                                            | 1567486                                                                                            | 1567487                                                                              |
| formula                                | C <sub>26</sub> H <sub>38</sub><br>Cl <sub>2</sub> Co N <sub>4</sub> | C <sub>26</sub> H <sub>37</sub> Co F <sub>12</sub><br>N <sub>4</sub> O <sub>2</sub> P <sub>2</sub> | C <sub>14</sub> H <sub>29</sub> Co<br>F <sub>12</sub> N <sub>4</sub> O <sub>2</sub> P <sub>2</sub> | C <sub>16</sub> H <sub>35</sub> Co<br>F <sub>6</sub> N <sub>4</sub> O <sub>3</sub> P |
| formual wt.                            | 536.43                                                               | 786.46                                                                                             | 634.28                                                                                             | 535.38                                                                               |
| space group                            | C 2/c                                                                | C 2/c                                                                                              | P 2 <sub>1</sub> 2 <sub>1</sub> 2 <sub>1</sub>                                                     | R 3 c                                                                                |
| a(Å)                                   | 9.149(2)                                                             | 16.0338(18)                                                                                        | 9.2044(11)                                                                                         | 25.992(3)                                                                            |
| b(Å)                                   | 13.467(2)                                                            | 11.4266(14)                                                                                        | 12.7702(17)                                                                                        | 25.992(3)                                                                            |
| c(Å)                                   | 20.060(6)                                                            | 17.658(2)                                                                                          | 19.650(3)                                                                                          | 17.3325(15)                                                                          |
| α(deg)                                 | 90                                                                   | 90                                                                                                 | 90                                                                                                 | 90                                                                                   |
| β(deg)                                 | 96.18(2)                                                             | 104.712(9)                                                                                         | 90                                                                                                 | 90                                                                                   |
| γ(deg)                                 | 90                                                                   | 90                                                                                                 | 90                                                                                                 | 120                                                                                  |
| V(Å <sup>3</sup> )                     | 2457.1(10)                                                           | 3129.1(6)                                                                                          | 2309.7(5)                                                                                          | 10141(2)                                                                             |
| Z                                      | 4                                                                    | 4                                                                                                  | 4                                                                                                  | 18                                                                                   |
| ρ <sub>calc</sub> (g/cm <sup>3</sup> ) | 1.450                                                                | 1.669                                                                                              | 1.824                                                                                              | 1.578                                                                                |
| temp(K)                                | 150(2)                                                               | 150(2)                                                                                             | 150(2)                                                                                             | 150(2)                                                                               |
| wavelength(Å)                          | 0.71073                                                              | 0.71073                                                                                            | 0.71073                                                                                            | 0.71073                                                                              |
| abs.<br>coeff.(mm <sup>-1</sup> )      | 0.939                                                                | 0.756                                                                                              | 0.999                                                                                              | 0.907                                                                                |
| R1(F <sub>o</sub> <sup>2</sup> ) =     | 0.0953                                                               | 0.0469                                                                                             | 0.0376                                                                                             | 0.0370                                                                               |
| wR2(F <sub>o</sub> <sup>2</sup> ) =    | 0.2144                                                               | 0.0924                                                                                             | 0.0509                                                                                             | 0.0563                                                                               |

$$^a |I| > 2\sigma(I) \quad ^b wR1 = \frac{\sum ||F_o| - |F_c||}{\sum |F_o|} \quad ^c wR2 = \frac{\{\sum w(F_o^2 - F_c^2)^2\}}{\sum [w(F_o^2)]^{1/2}} \quad w = 1/[s^2(F_o^2) + (aP)^2 + bP] \text{ where } P = (F_o^2 + 2F_c^2)/3$$

**Table S2.** Crystal Data and Structural Refinement Details for Nickel Complexes

| Complex                                | [Ni(1)Cl <sub>2</sub> ]<br>sja4_04                                | [Ni(2)Cl <sub>2</sub> ]<br>sja65_06                               | [Ni(2)(OAc)<br>(H <sub>2</sub> O)]PF <sub>6</sub><br>sja309                       | [Ni(4)(OAc)]<br>PF <sub>6</sub><br>sja2_08                                        | [Ni(6)(OAc)]<br>PF <sub>6</sub><br>sja24_08                                                       |
|----------------------------------------|-------------------------------------------------------------------|-------------------------------------------------------------------|-----------------------------------------------------------------------------------|-----------------------------------------------------------------------------------|---------------------------------------------------------------------------------------------------|
| CCDC number                            | 1566343                                                           | 1566346                                                           | 1566345                                                                           | 1567488                                                                           | 1567489                                                                                           |
| formula                                | C <sub>26</sub> H <sub>38</sub> Cl <sub>2</sub> N <sub>4</sub> Ni | C <sub>24</sub> H <sub>34</sub> Cl <sub>2</sub> N <sub>4</sub> Ni | C <sub>27</sub> H <sub>43</sub> F <sub>6</sub> N <sub>4</sub> Ni O <sub>4</sub> P | C <sub>20</sub> H <sub>33</sub> F <sub>6</sub> N <sub>4</sub> Ni O <sub>2</sub> P | C <sub>15</sub> H <sub>31</sub> Cl <sub>2</sub> F <sub>6</sub> N <sub>4</sub> Ni O <sub>2</sub> P |
| formual wt.                            | 536.21                                                            | 508.16                                                            | 691.33                                                                            | 565.18                                                                            | 574.02                                                                                            |
| space group                            | C 222 <sub>1</sub>                                                | C 2/c                                                             | P 2 <sub>1</sub> /c                                                               | P -1                                                                              | P 2 <sub>1</sub> /n                                                                               |
| a(Å)                                   | 9.0137(16)                                                        | 8.8352(17)                                                        | 18.1480(18)                                                                       | 7.6252(10)                                                                        | 12.0210(16)                                                                                       |
| b(Å)                                   | 13.3814(17)                                                       | 13.1417(17)                                                       | 9.4592(8)                                                                         | 11.0029(14)                                                                       | 16.226(3)                                                                                         |
| c(Å)                                   | 20.352(3)                                                         | 19.920(3)                                                         | 20.795(2)                                                                         | 14.884(2)                                                                         | 12.4026(16)                                                                                       |
| α(deg)                                 | 90                                                                | 90                                                                | 90                                                                                | 71.316(10)                                                                        | 90                                                                                                |
| β(deg)                                 | 90                                                                | 91.985(16)                                                        | 119.919(7)                                                                        | 81.906(11)                                                                        | 103.909(10)                                                                                       |
| γ(deg)                                 | 90                                                                | 90                                                                | 90                                                                                | 87.281(11)                                                                        | 90                                                                                                |
| V(Å <sup>3</sup> )                     | 2454.8(6)                                                         | 2311.5(6)                                                         | 3094.0(5)                                                                         | 1171.2(3)                                                                         | 2348.3(6)                                                                                         |
| Z                                      | 4                                                                 | 4                                                                 | 4                                                                                 | 2                                                                                 | 4                                                                                                 |
| ρ <sub>calc</sub> (g/cm <sup>3</sup> ) | 1.451                                                             | 1.460                                                             | 1.484                                                                             | 1.603                                                                             | 1.624                                                                                             |
| temp(K)                                | 150(2)                                                            | 150(2)                                                            | 150(2)                                                                            | 150(2)                                                                            | 150(2)                                                                                            |
| wavelength(Å)                          | 0.71073                                                           | 0.71073                                                           | 0.71073                                                                           | 0.71073                                                                           | 0.71073                                                                                           |
| abs. coeff.(mm <sup>-1</sup> )         | 1.031                                                             | 1.090                                                             | 0.754                                                                             | 0.970                                                                             | 1.189                                                                                             |
| R1(F <sub>o</sub> <sup>2</sup> ) =     | 0.0311                                                            | 0.0258                                                            | 0.0352                                                                            | 0.0478                                                                            | 0.0678                                                                                            |
| wR2(F <sub>o</sub> <sup>2</sup> ) =    | 0.0603                                                            | 0.0670                                                            | 0.0775                                                                            | 0.1669                                                                            | 0.1275                                                                                            |

$$^a |I| > 2\sigma(I) \quad ^b wR1 = \frac{\sum ||F_o| - |F_c||}{\sum |F_o|} \quad ^c wR2 = \frac{[\sum w(F_o^2 - F_c^2)^2]}{[\sum w(F_o^2)^2]}^{1/2} \quad w = 1/[s^2(F_o^2) + (aP)^2 + bP] \text{ where } P = (F_o^2 + 2F_c^2)/3$$

**Table S3.** Selected bond lengths [Å] and angles [°]:

|                      |            | [Co(1)Cl <sub>2</sub> ]                          |            |  |  |
|----------------------|------------|--------------------------------------------------|------------|--|--|
| Co(1)-N(1)#1         | 2.185(8)   | Co(1)-N(2)                                       | 2.294(8)   |  |  |
| Co(1)-N(1)           | 2.185(8)   | Co(1)-Cl(1)                                      | 2.426(3)   |  |  |
| Co(1)-N(2)#1         | 2.294(8)   | Co(1)-Cl(1)#1                                    | 2.426(3)   |  |  |
| N(1)#1-Co(1)-N(1)    | 82.5(4)    | N(2)-Co(1)-Cl(1)#1                               | 89.2(2)    |  |  |
| N(1)#1-Co(1)-N(2)#1  | 89.2(3)    | Cl(1)-Co(1)-Cl(1)#1                              | 93.27(13)  |  |  |
| N(1)-Co(1)-N(2)#1    | 81.6(3)    | N(2)#1-Co(1)-N(2)                                | 167.7(4)   |  |  |
| N(1)#1-Co(1)-N(2)    | 81.6(3)    | N(1)#1-Co(1)-Cl(1)                               | 92.8(2)    |  |  |
| N(1)-Co(1)-N(2)      | 89.2(3)    | N(1)-Co(1)-Cl(1)                                 | 169.7(2)   |  |  |
| N(1)#1-Co(1)-Cl(1)#1 | 169.7(2)   | N(2)#1-Co(1)-Cl(1)                               | 89.2(2)    |  |  |
| N(1)-Co(1)-Cl(1)#1   | 92.8(2)    | N(2)-Co(1)-Cl(1)                                 | 99.25(19)  |  |  |
| N(2)#1-Co(1)-Cl(1)#1 | 99.25(19)  |                                                  |            |  |  |
|                      |            | [Co(2)(OAc)](PF <sub>6</sub> ) <sub>2</sub>      |            |  |  |
| Co(1)-N(1)           | 1.898(3)   | Co(1)-O(1)                                       | 1.939(3)   |  |  |
| Co(1)-N(1)#1         | 1.898(3)   | Co(1)-N(2)#1                                     | 2.033(3)   |  |  |
| Co(1)-O(1)#1         | 1.939(3)   | Co(1)-N(2)                                       | 2.033(3)   |  |  |
| N(1)-Co(1)-N(1)#1    | 90.42(17)  | O(1)#1-Co(1)-N(2)#1                              | 95.35(12)  |  |  |
| N(1)-Co(1)-O(1)#1    | 168.86(12) | O(1)-Co(1)-N(2)#1                                | 92.29(11)  |  |  |
| N(1)#1-Co(1)-O(1)#1  | 100.71(12) | N(1)-Co(1)-N(2)                                  | 88.22(12)  |  |  |
| N(1)-Co(1)-O(1)      | 100.71(12) | N(1)#1-Co(1)-N(2)                                | 85.28(12)  |  |  |
| N(1)#1-Co(1)-O(1)    | 168.86(12) | O(1)#1-Co(1)-N(2)                                | 92.29(11)  |  |  |
| O(1)#1-Co(1)-O(1)    | 68.16(18)  | O(1)-Co(1)-N(2)                                  | 95.36(12)  |  |  |
| N(1)-Co(1)-N(2)#1    | 85.28(12)  | N(2)#1-Co(1)-N(2)                                | 170.77(16) |  |  |
| N(1)#1-Co(1)-N(2)#1  | 88.22(12)  |                                                  |            |  |  |
|                      |            | [Co(6)(OAc)](PF <sub>6</sub> ) <sub>2</sub>      |            |  |  |
| Co(1)-N(1)           | 1.901(7)   | Co(1)-O(1)                                       | 1.939(6)   |  |  |
| Co(1)-N(3)           | 1.905(7)   | Co(1)-N(2)                                       | 2.004(4)   |  |  |
| Co(1)-O(2)           | 1.927(6)   | Co(1)-N(4)                                       | 2.008(4)   |  |  |
| N(1)-Co(1)-N(3)      | 90.85(19)  | O(2)-Co(1)-N(2)                                  | 92.5(3)    |  |  |
| N(1)-Co(1)-O(2)      | 168.5(3)   | O(1)-Co(1)-N(2)                                  | 94.3(3)    |  |  |
| N(3)-Co(1)-O(2)      | 100.6(3)   | N(1)-Co(1)-N(4)                                  | 84.6(3)    |  |  |
| N(1)-Co(1)-O(1)      | 101.0(3)   | N(3)-Co(1)-N(4)                                  | 89.0(3)    |  |  |
| N(3)-Co(1)-O(1)      | 168.2(3)   | O(2)-Co(1)-N(4)                                  | 95.4(3)    |  |  |
| O(2)-Co(1)-O(1)      | 67.57(19)  | O(1)-Co(1)-N(4)                                  | 92.7(3)    |  |  |
| N(1)-Co(1)-N(2)      | 88.6(3)    | N(2)-Co(1)-N(4)                                  | 171.06(19) |  |  |
| N(3)-Co(1)-N(2)      | 85.3(3)    |                                                  |            |  |  |
|                      |            | [Co(5)(OAc)(H <sub>2</sub> O)](PF <sub>6</sub> ) |            |  |  |
| O(1)-Co(1)           | 2.042(4)   | N(2)-Co(1)                                       | 2.167(6)   |  |  |
| N(1)-Co(1)           | 2.128(5)   | N(4)-Co(1)                                       | 2.190(6)   |  |  |
| N(3)-Co(1)           | 2.124(5)   | Co(1)-O(1W)                                      | 2.111(5)   |  |  |
| O(1)-Co(1)-O(1W)     | 88.18(18)  | N(3)-Co(1)-N(2)                                  | 84.5(2)    |  |  |
| O(1)-Co(1)-N(3)      | 172.38(19) | N(1)-Co(1)-N(2)                                  | 90.9(2)    |  |  |
| O(1W)-Co(1)-N(3)     | 97.61(18)  | O(1)-Co(1)-N(4)                                  | 95.27(18)  |  |  |
| O(1)-Co(1)-N(1)      | 91.71(18)  | O(1W)-Co(1)-N(4)                                 | 86.60(19)  |  |  |
| O(1W)-Co(1)-N(1)     | 170.6(2)   | N(3)-Co(1)-N(4)                                  | 90.0(2)    |  |  |
| N(3)-Co(1)-N(1)      | 83.39(19)  | N(1)-Co(1)-N(4)                                  | 84.1(2)    |  |  |
| O(1)-Co(1)-N(2)      | 89.77(19)  | N(2)-Co(1)-N(4)                                  | 173.0(2)   |  |  |
| O(1W)-Co(1)-N(2)     | 98.4(2)    |                                                  |            |  |  |

[Ni(1)Cl<sub>2</sub>]

|                     |            |                      |           |
|---------------------|------------|----------------------|-----------|
| Ni(1)-N(1)          | 2.122(3)   | Ni(1)-N(2)#1         | 2.227(3)  |
| Ni(1)-N(1)#1        | 2.122(3)   | Ni(1)-Cl(1)          | 2.4338(9) |
| Ni(1)-N(2)          | 2.227(3)   | Ni(1)-Cl(1)#1        | 2.4338(9) |
| N(1)-Ni(1)-N(1)#1   | 84.56(16)  | N(2)-Ni(1)-Cl(1)     | 98.40(7)  |
| N(1)-Ni(1)-N(2)     | 83.70(11)  | N(2)#1-Ni(1)-Cl(1)   | 88.05(8)  |
| N(1)#1-Ni(1)-N(2)   | 89.45(11)  | N(1)-Ni(1)-Cl(1)#1   | 171.18(8) |
| N(1)-Ni(1)-N(2)#1   | 89.45(11)  | N(1)#1-Ni(1)-Cl(1)#1 | 92.28(8)  |
| N(1)#1-Ni(1)-N(2)#1 | 83.70(11)  | N(2)-Ni(1)-Cl(1)#1   | 88.05(8)  |
| N(2)-Ni(1)-N(2)#1   | 170.75(15) | N(2)#1-Ni(1)-Cl(1)#1 | 98.40(7)  |
| N(1)-Ni(1)-Cl(1)    | 92.28(8)   | Cl(1)-Ni(1)-Cl(1)#1  | 92.00(5)  |
| N(1)#1-Ni(1)-Cl(1)  | 171.18(8)  |                      |           |

[Ni(2)Cl<sub>2</sub>]

|                      |            |                      |            |
|----------------------|------------|----------------------|------------|
| Ni(1)-N(1)#1         | 2.0845(13) | Ni(1)-N(2)#1         | 2.1779(12) |
| Ni(1)-N(1)           | 2.0845(13) | Ni(1)-Cl(1)#1        | 2.4059(5)  |
| Ni(1)-N(2)           | 2.1779(12) | Ni(1)-Cl(1)          | 2.4059(5)  |
| N(1)#1-Ni(1)-N(1)    | 83.37(9)   | N(2)-Ni(1)-Cl(1)#1   | 99.43(3)   |
| N(1)#1-Ni(1)-N(2)    | 83.74(5)   | N(2)#1-Ni(1)-Cl(1)#1 | 95.78(4)   |
| N(1)-Ni(1)-N(2)      | 80.16(5)   | N(1)#1-Ni(1)-Cl(1)   | 176.59(5)  |
| N(1)#1-Ni(1)-N(2)#1  | 80.16(5)   | N(1)-Ni(1)-Cl(1)     | 93.23(5)   |
| N(1)-Ni(1)-N(2)#1    | 83.74(5)   | N(2)-Ni(1)-Cl(1)     | 95.78(4)   |
| N(2)-Ni(1)-N(2)#1    | 158.40(7)  | N(2)#1-Ni(1)-Cl(1)   | 99.43(4)   |
| N(1)#1-Ni(1)-Cl(1)#1 | 93.23(5)   | Cl(1)#1-Ni(1)-Cl(1)  | 90.18(3)   |
| N(1)-Ni(1)-Cl(1)#1   | 176.59(5)  |                      |            |

[Ni(2)(OAc)(H<sub>2</sub>O)](PF<sub>6</sub>)

|                 |            |                 |            |
|-----------------|------------|-----------------|------------|
| Ni(1)-N(1)      | 2.0368(18) | Ni(1)-O(3)      | 2.0770(15) |
| Ni(1)-N(3)      | 2.0521(17) | Ni(1)-N(2)      | 2.1392(17) |
| Ni(1)-O(1)      | 2.0639(14) | Ni(1)-N(4)      | 2.1672(17) |
| N(1)-Ni(1)-N(3) | 85.59(7)   | O(1)-Ni(1)-N(2) | 94.46(6)   |
| N(1)-Ni(1)-O(1) | 90.70(7)   | O(3)-Ni(1)-N(2) | 91.90(6)   |
| N(3)-Ni(1)-O(1) | 175.36(6)  | N(1)-Ni(1)-N(4) | 82.41(7)   |
| N(1)-Ni(1)-O(3) | 176.88(7)  | N(3)-Ni(1)-N(4) | 85.32(7)   |
| N(3)-Ni(1)-O(3) | 95.97(6)   | O(1)-Ni(1)-N(4) | 96.97(6)   |
| O(1)-Ni(1)-O(3) | 87.61(6)   | O(3)-Ni(1)-N(4) | 100.38(6)  |
| N(1)-Ni(1)-N(2) | 85.62(7)   | N(2)-Ni(1)-N(4) | 163.52(6)  |
| N(3)-Ni(1)-N(2) | 82.49(7)   |                 |            |

[Ni(4)(OAc)](PF<sub>6</sub>)

|                 |            |                 |            |
|-----------------|------------|-----------------|------------|
| Ni(1)-N(1)      | 2.023(3)   | Ni(1)-O(2)      | 2.109(3)   |
| Ni(1)-N(3)      | 2.026(4)   | Ni(1)-N(2)      | 2.139(3)   |
| Ni(1)-O(1)      | 2.102(3)   | Ni(1)-N(4)      | 2.160(3)   |
| N(1)-Ni(1)-N(3) | 87.69(14)  | O(1)-Ni(1)-N(2) | 94.76(12)  |
| N(1)-Ni(1)-O(1) | 166.80(13) | O(2)-Ni(1)-N(2) | 98.66(13)  |
| N(3)-Ni(1)-O(1) | 105.49(13) | N(1)-Ni(1)-N(4) | 82.67(13)  |
| N(1)-Ni(1)-O(2) | 103.84(13) | N(3)-Ni(1)-N(4) | 85.12(14)  |
| N(3)-Ni(1)-O(2) | 168.45(13) | O(1)-Ni(1)-N(4) | 98.98(12)  |
| O(1)-Ni(1)-O(2) | 63.01(12)  | O(2)-Ni(1)-N(4) | 95.37(12)  |
| N(1)-Ni(1)-N(2) | 85.95(13)  | N(2)-Ni(1)-N(4) | 163.71(13) |
| N(3)-Ni(1)-N(2) | 82.79(14)  |                 |            |

[Ni(6)(OAc)]PF<sub>6</sub>

|                 |            |                 |            |
|-----------------|------------|-----------------|------------|
| Ni(1)-N(3)      | 2.018(4)   | Ni(1)-O(2)      | 2.102(3)   |
| Ni(1)-N(1)      | 2.027(4)   | Ni(1)-N(4)      | 2.142(4)   |
| Ni(1)-O(1)      | 2.086(3)   | Ni(1)-N(2)      | 2.147(4)   |
| N(3)-Ni(1)-N(1) | 87.08(14)  | O(1)-Ni(1)-N(4) | 96.30(14)  |
| N(3)-Ni(1)-O(1) | 105.08(13) | O(2)-Ni(1)-N(4) | 98.84(14)  |
| N(1)-Ni(1)-O(1) | 167.82(13) | N(3)-Ni(1)-N(2) | 85.46(15)  |
| N(3)-Ni(1)-O(2) | 167.82(14) | N(1)-Ni(1)-N(2) | 82.62(15)  |
| N(1)-Ni(1)-O(2) | 105.04(14) | O(1)-Ni(1)-N(2) | 97.57(14)  |
| O(1)-Ni(1)-O(2) | 62.78(13)  | O(2)-Ni(1)-N(2) | 94.89(14)  |
| N(3)-Ni(1)-N(4) | 82.92(15)  | N(4)-Ni(1)-N(2) | 163.82(14) |
| N(1)-Ni(1)-N(4) | 85.58(15)  |                 |            |

## UV-Vis Spectra of Complexes

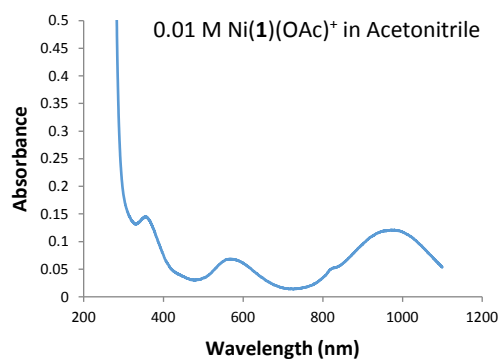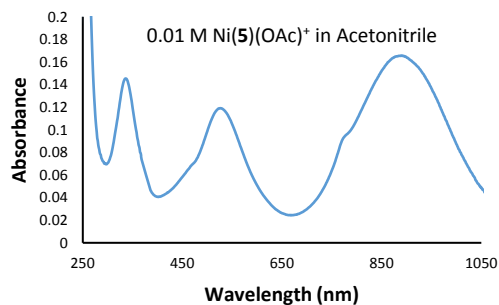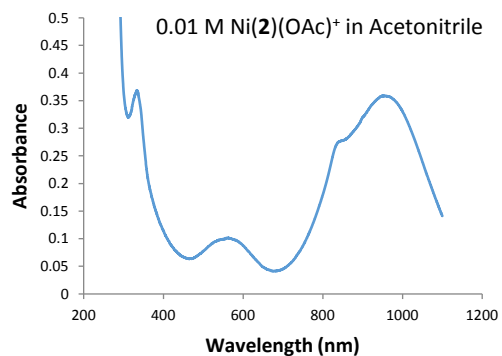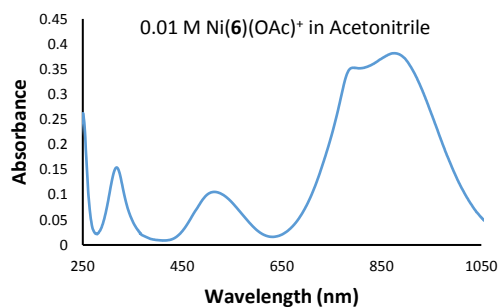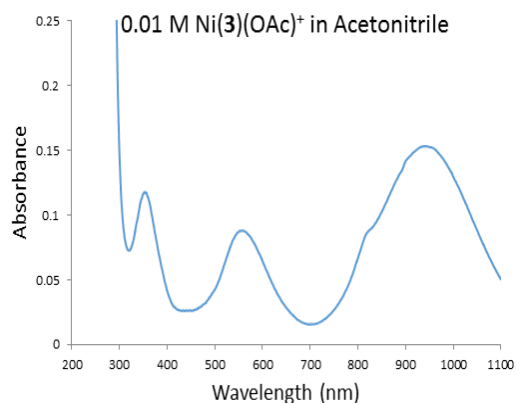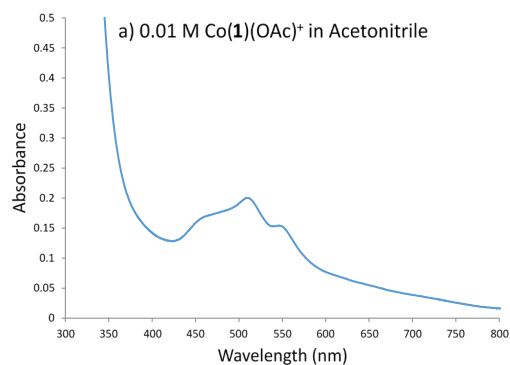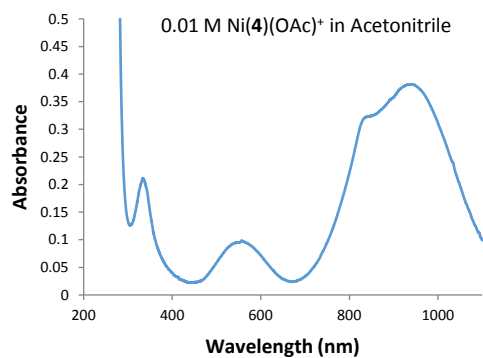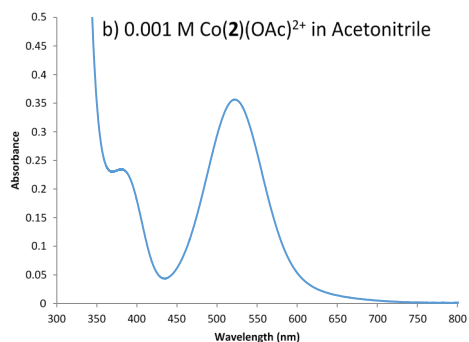

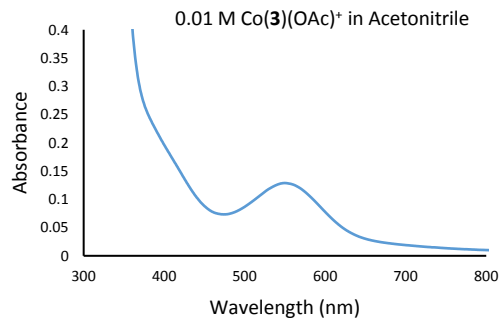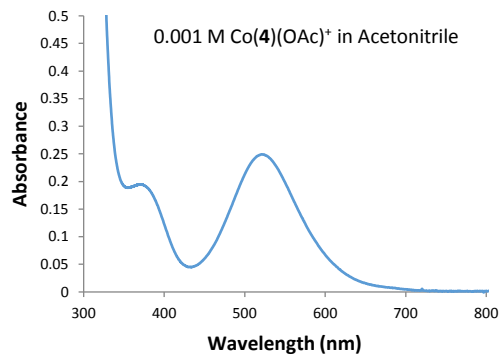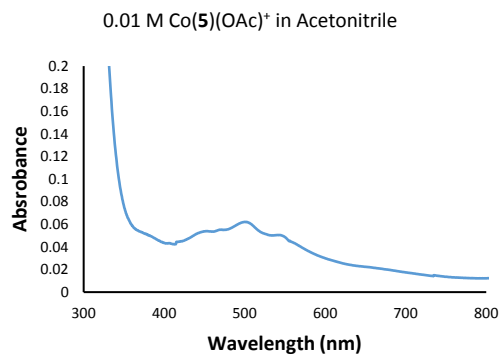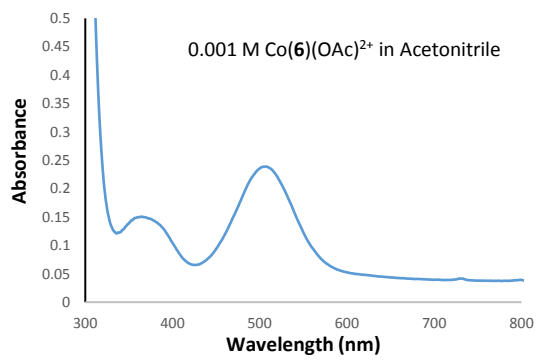

**Cyclic Voltammograms of Complexes 0.001 M in Acetonitrile with 0.1 M TBAPF<sub>6</sub> supporting electrolyte**

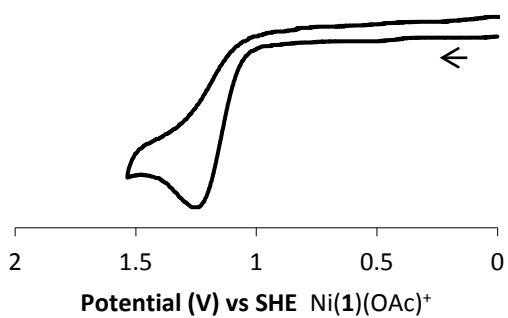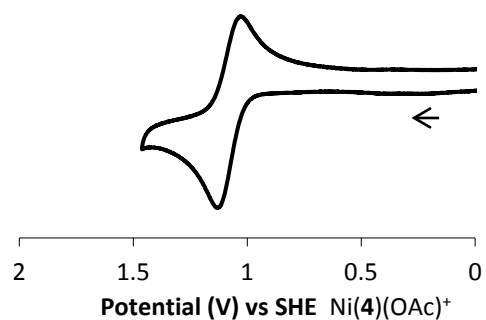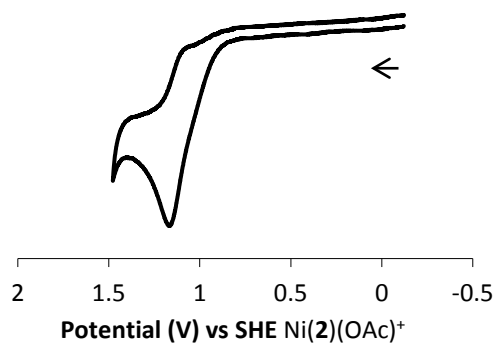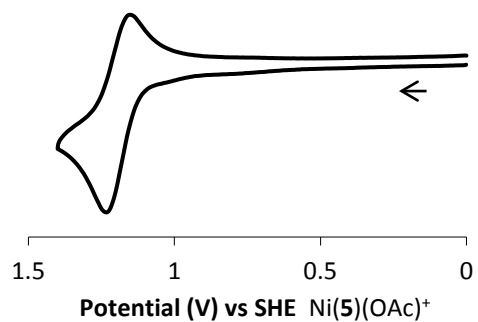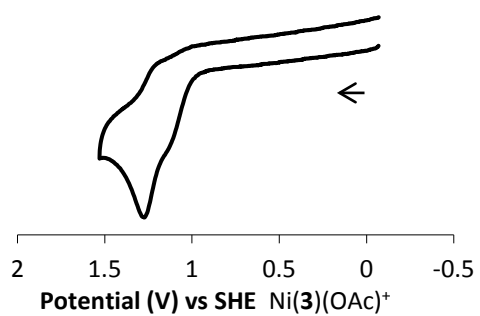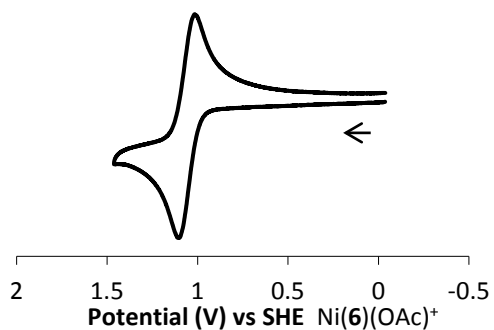



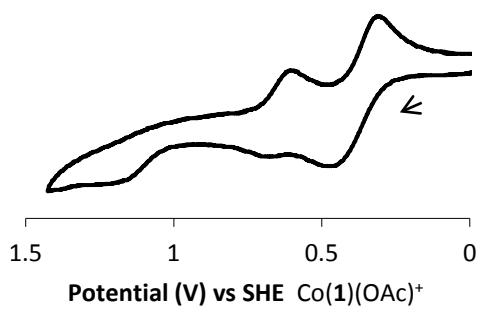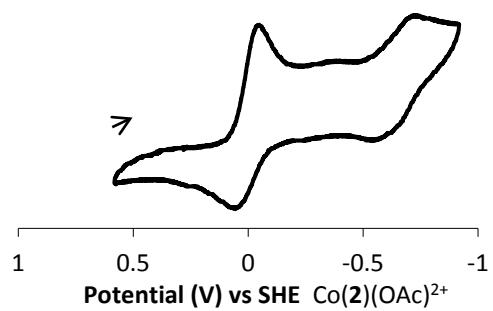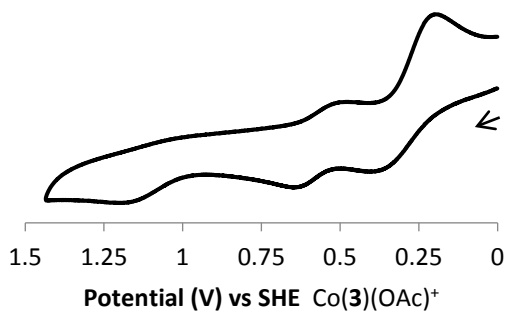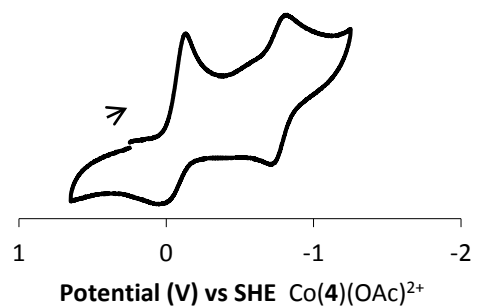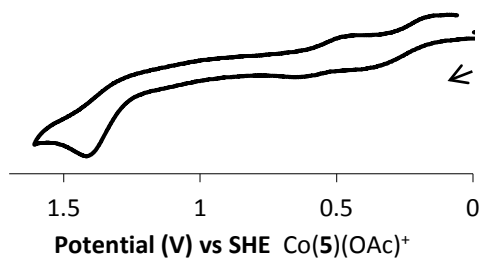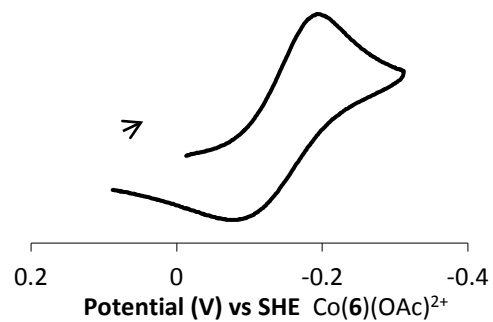

Supplement: NIHMS1562363-supplement-Supplementary.pdf [file NIHMS1562363-supplement-Supplementary.pdf]
